# Supplementary material for: A novel Janus nanomachine based on mesoporous silica nanoparticles anisotropically modified with PAMAM dendrimers for enzyme-controlled drug delivery
Source: Royal Society of Chemistry journal article supplement (doi:10.1039/d4nr03740e), 2025-01-01
Supplement: d4nr03740e1.pdf [file d4nr03740e1.pdf]

## SUPPORTING INFORMATION

### Novel Janus nanomachine based on mesoporous silica nanoparticles anisotropically modified with PAMAM dendrimers for enzyme controlled drug delivery

Beatriz Mayol,<sup>a</sup> Esther García,<sup>a</sup> Alexander Hoppe,<sup>a</sup> Lucía Espejo,<sup>a</sup> Miranda Muñoz,<sup>a</sup> Marta González,<sup>a</sup> Anabel Villalonga,<sup>a</sup> Teresa Moreno,<sup>a</sup> Alfredo Sánchez,<sup>a</sup> Diana Vilela,<sup>a</sup> Narcisca Martínez-Quiles,<sup>b</sup> Paloma Martínez-Ruiz<sup>a</sup> and Reynaldo Villalonga<sup>\*a</sup>

<sup>a</sup>Nanosensors and Nanomachines Group, Faculty of Chemistry, Complutense University of Madrid, 28040 Madrid, Spain.

<sup>b</sup>Department of Immunology, Ophthalmology and ENT, School of Medicine Complutense University, 28040 Madrid, Spain.

\*Corresponding author: rvillalonga@quim.ucm.es

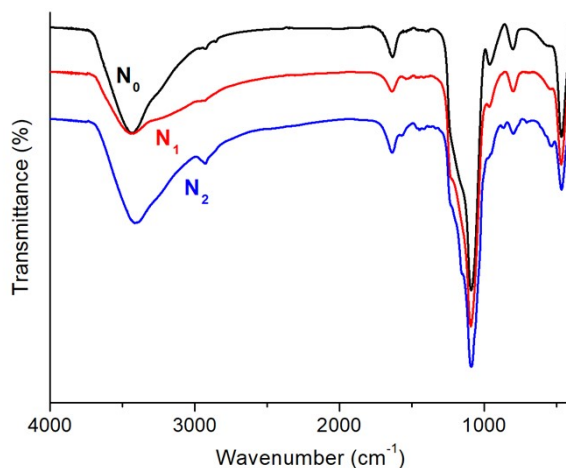

Figure 1S. FT-IR analysis for N<sub>0</sub>-N<sub>2</sub>.

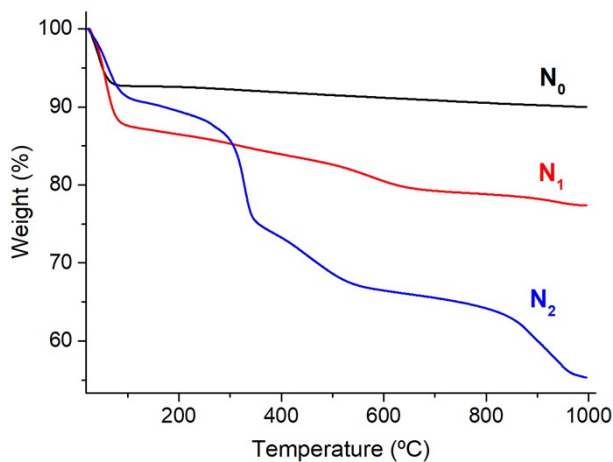

Figure 2S. Thermogravimetric analysis for N<sub>0</sub>-N<sub>2</sub>.

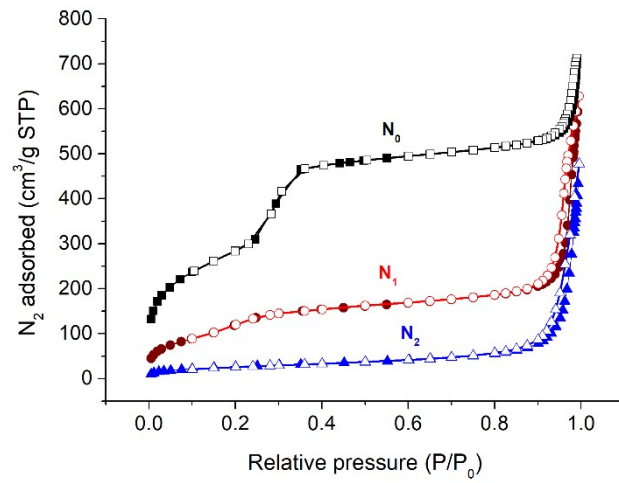

Figure 3S. Nitrogen adsorption (filled)/desorption (open) isotherms for  $N_0$ - $N_2$ .

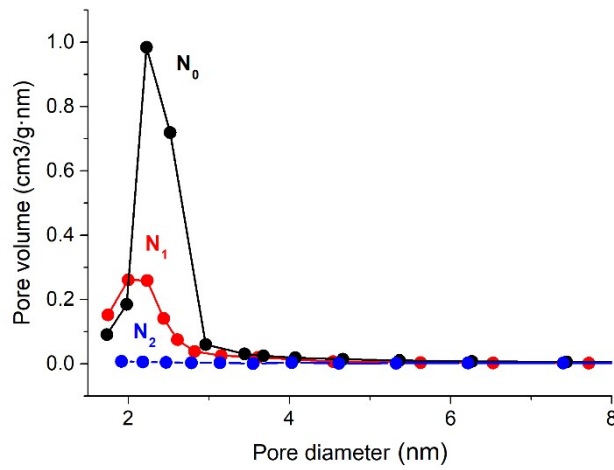

Figure 4S. Pore size distribution for  $N_0$ - $N_2$ .

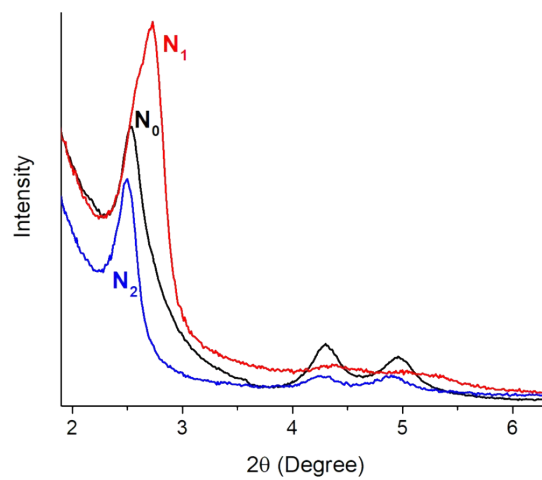

Figure 5S. X-ray diffraction analysis for  $N_0$ - $N_2$ .

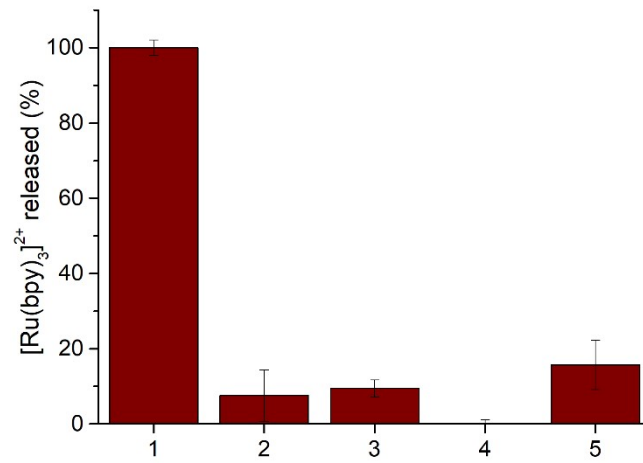

Figure 6S. Relative dye release from N<sub>3</sub> dispersion after 2 h incubation in 100 mmol/L sodium phosphate buffer, pH 7.5, containing 100 mmol/L of glucose (1), lactose (2), sucrose (3), galactose (4) or fructose (5).

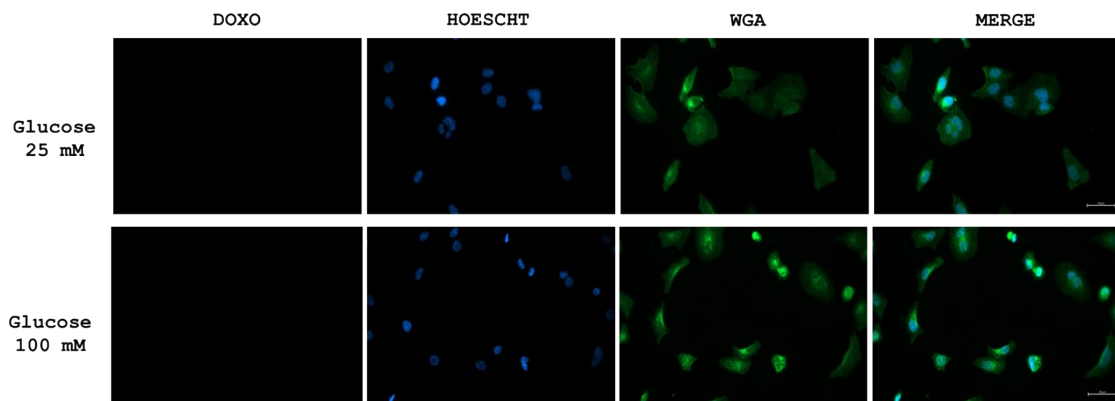

Figure 7S. Fluorescence microscopy images of HeLa cell without treatment with  $N_4$  (control) in the presence of 25 mM and 100 mM glucose. Images were acquired after 4 h incubation for Alexa Flour-488 conjugated wheat germ agglutinin (WGA), Doxorubicin (DOXO), Hoechst and combined (Merge). Scale bar: 20  $\mu$ m.

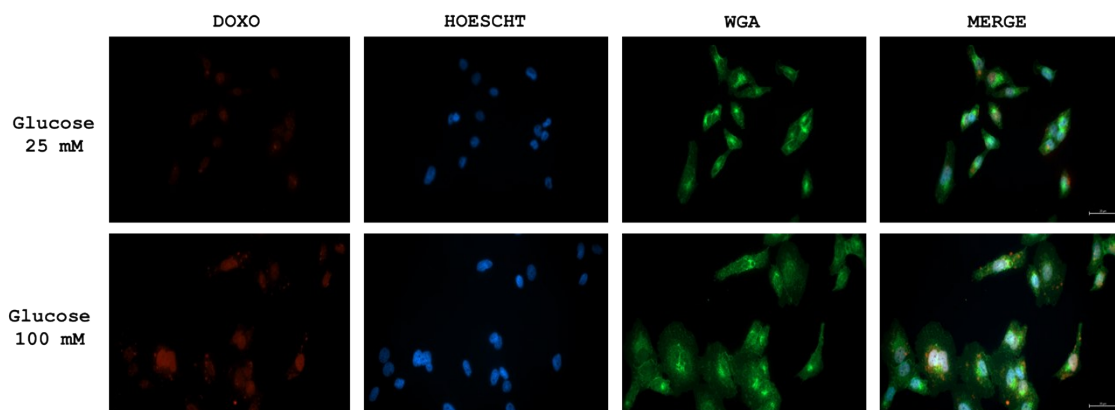

Figure 8S. Fluorescence microscopy images of HeLa cell and incubated with 100  $\mu$ g/ml  $N_4$  in the presence of 25 mM and 100 mM glucose. Images were acquired after 4 h incubation for Alexa Flour-488 conjugated wheat germ agglutinin (WGA), Doxorubicin (DOXO), Hoechst and combined (Merge). Scale bar: 20  $\mu$ m.

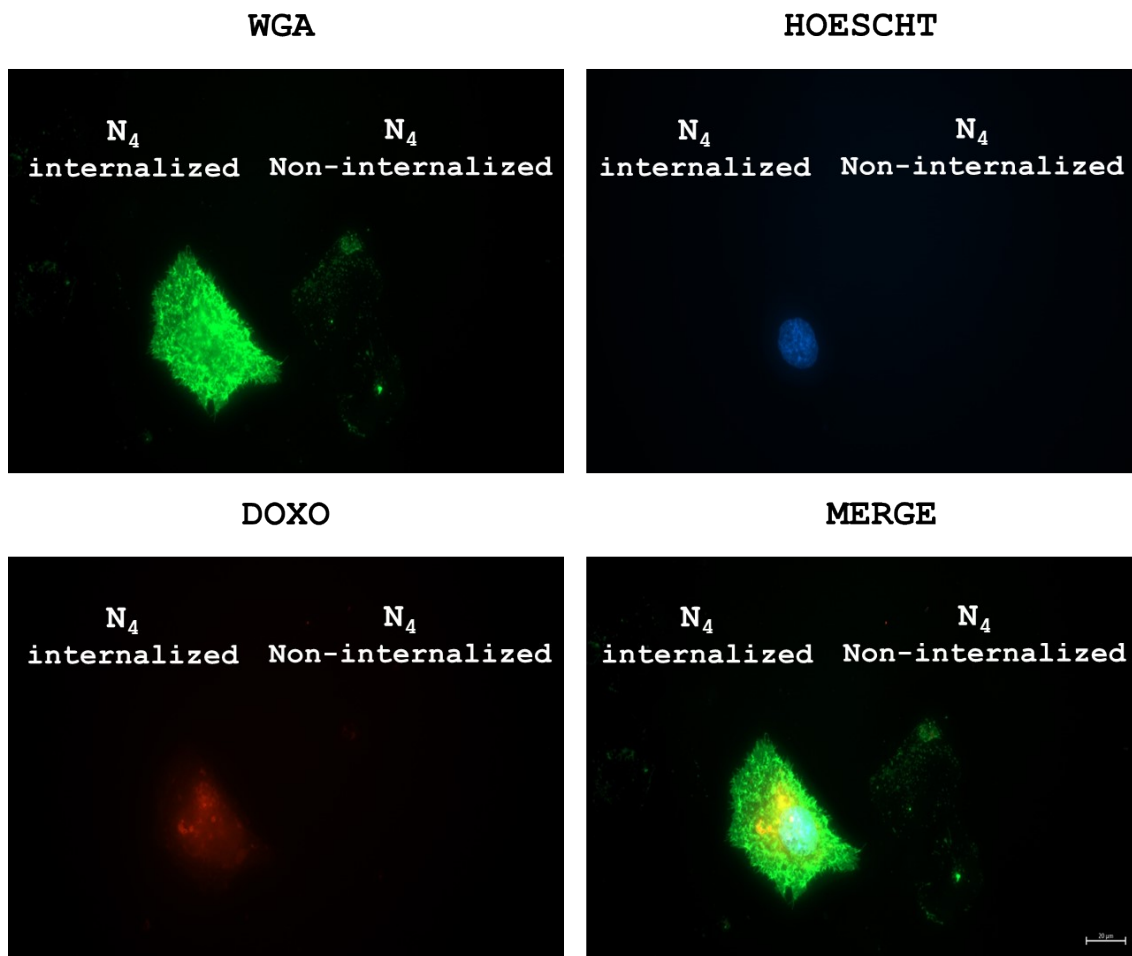

Figure 9S. Fluorescence microscopy images of HeLa cell and incubated with 100  $\mu\text{g}/\text{ml}$   $\text{N}_4$  in the presence of 100 mM glucose. Images were acquired after 4 h incubation for Alexa Flour-488 conjugated wheat germ agglutinin (WGA), Doxorubicin (DOXO), Hoechst and combined (Merge). Scale bar: 20  $\mu\text{m}$ .
